# Supplementary material for: Evaluation of Antioxidant Capacity and Gut Microbiota Modulatory Effects of Different Kinds of Berries
Source: MDPI journal article supplement (doi:10.3390/antiox11051020), 2022-05-22
Supplement: s1 [file s1]

**Table S1. PCR conditions**

Both forward and reverse primers were tagged with Illumina adapter, pad and linker sequences. PCR enrichment was performed in a 50  $\mu$ L reaction containing 30ng template, fusion PCR primer and PCR master mix. PCR cycling conditions were as follows:

| Temperature | Time       | Number of cycles |
|-------------|------------|------------------|
| 95°C        | 3 minutes  | /                |
| 95°C        | 45 seconds | 30 cycles        |
| 56°C        | 45 seconds |                  |
| 72°C        | 45 seconds |                  |
| 72°C        | 10 minutes | /                |

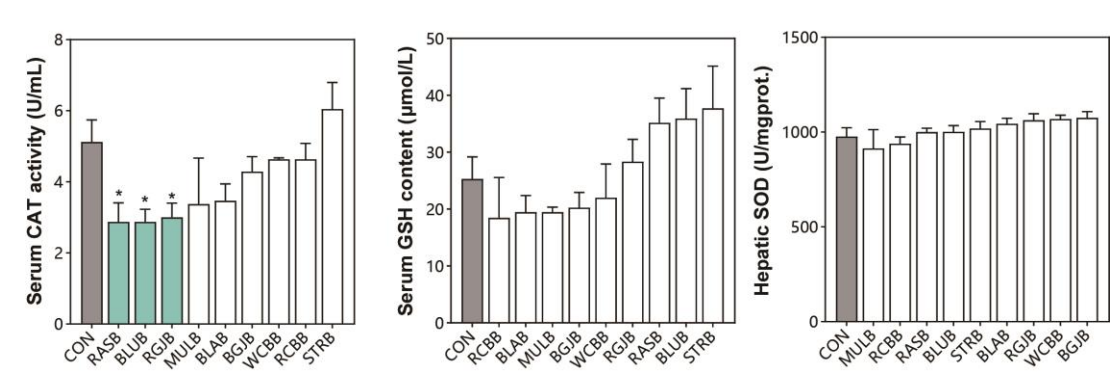

Figure S1. Influence of berry extracts on the antioxidant capacities of healthy objects. Error bars were expressed as mean  $\pm$  SEM (n = 7/group). Statistical significance was determined by Mann-Whitney *U* test for two groups comparisons. \*, compared with control group. \*,  $P < 0.05$ ; \*\*,  $P < 0.01$ .

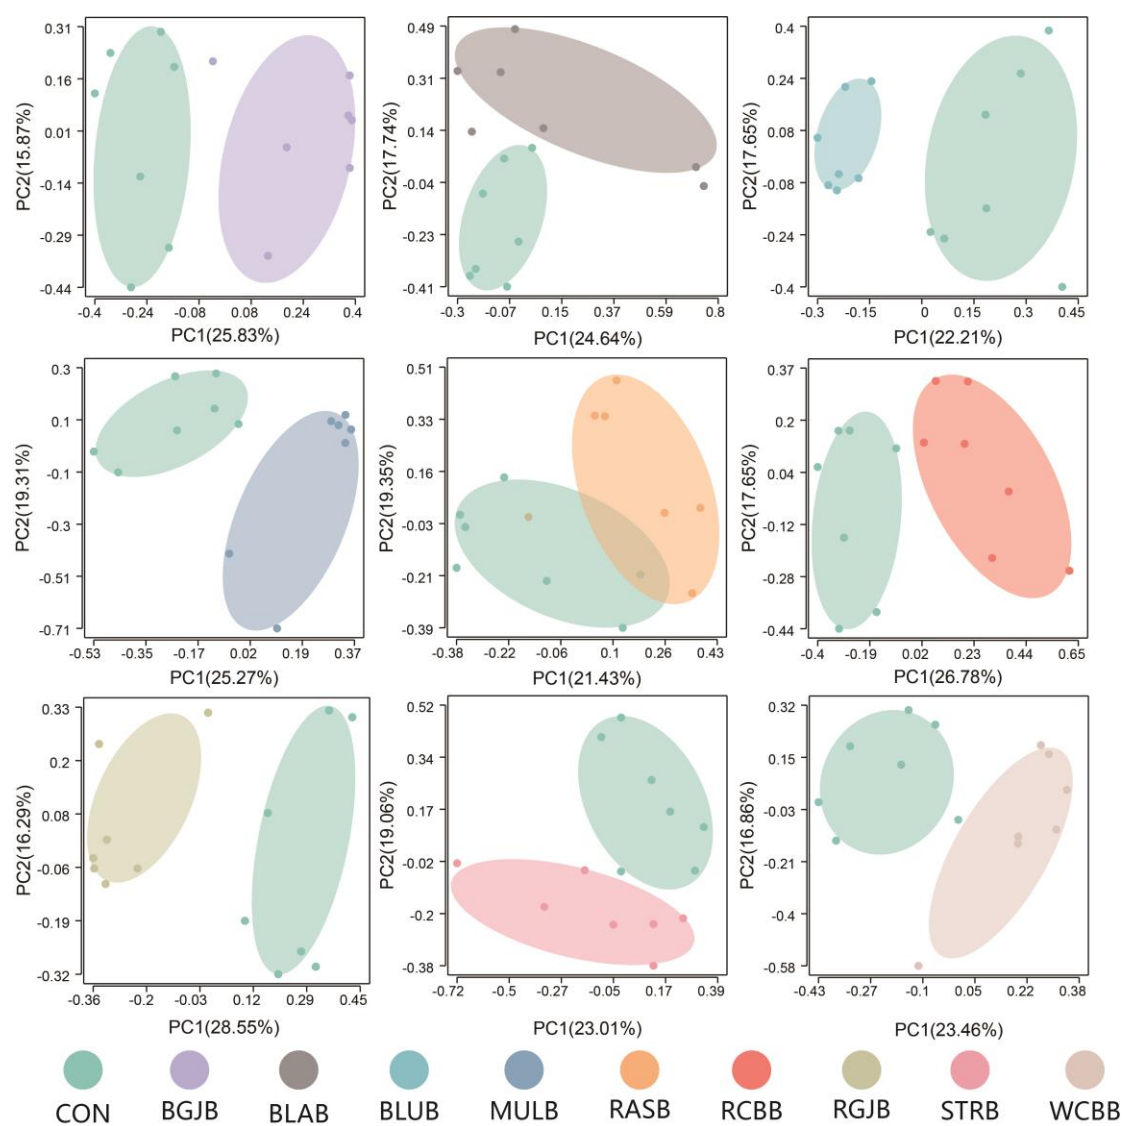

Figure S2. Principal component analysis (PCA) plot of the gut microbiota composition at the operational taxonomic unit (OTU) level from different groups (n = 7/group).

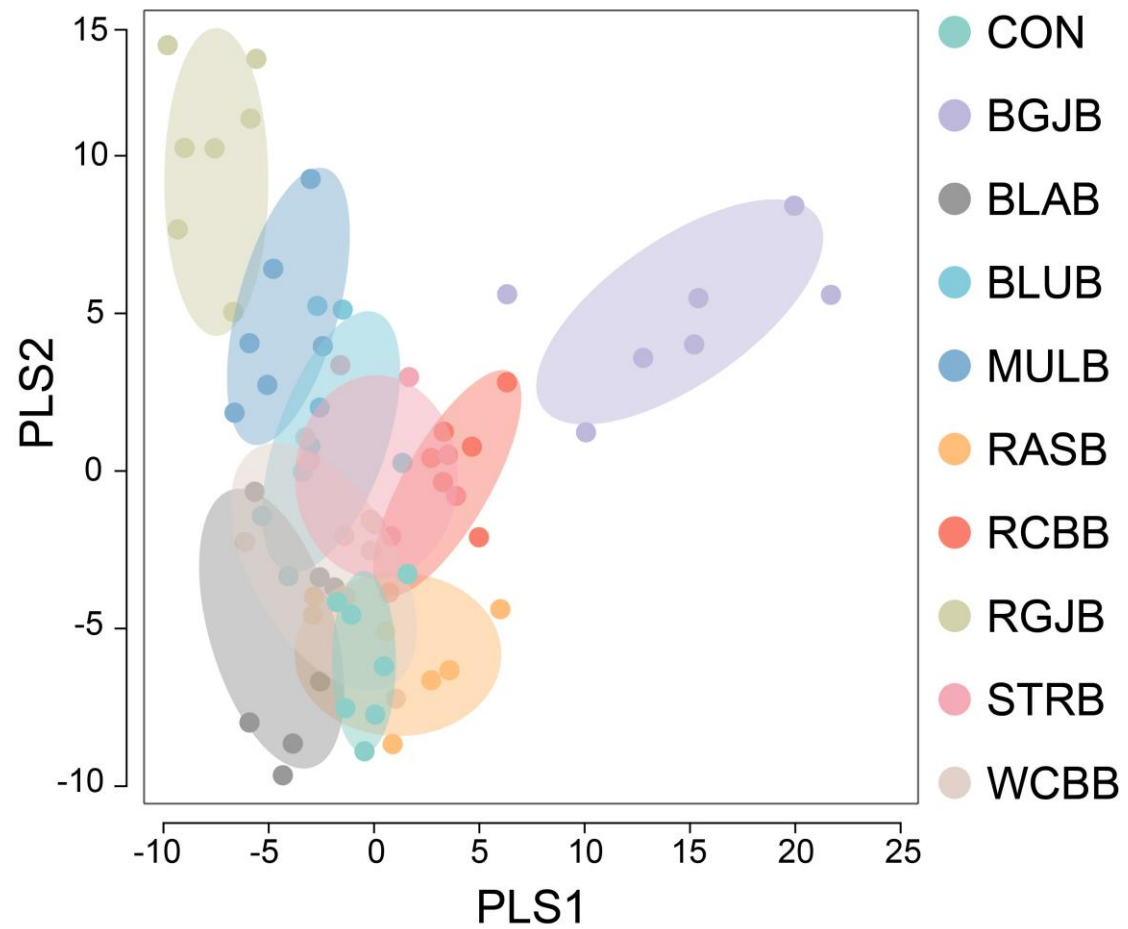

Figure S3: Partial least squares discriminant analysis (PLS-DA) of the gut microbiota composition at the operational taxonomic unit (OTU) level from different groups (n = 7/group).

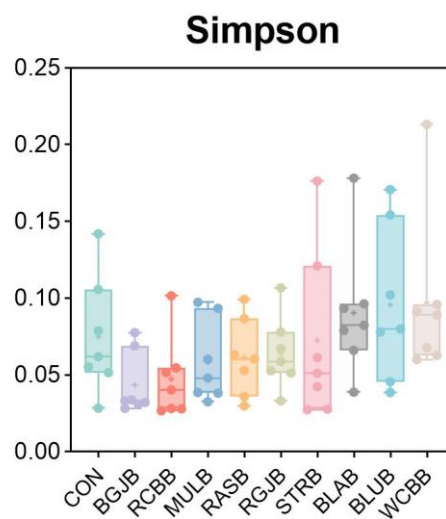

Figure S4: Alpha diversity analysis of gut bacterial diversity (Simpson index) from different mouse groups (n = 7/group).

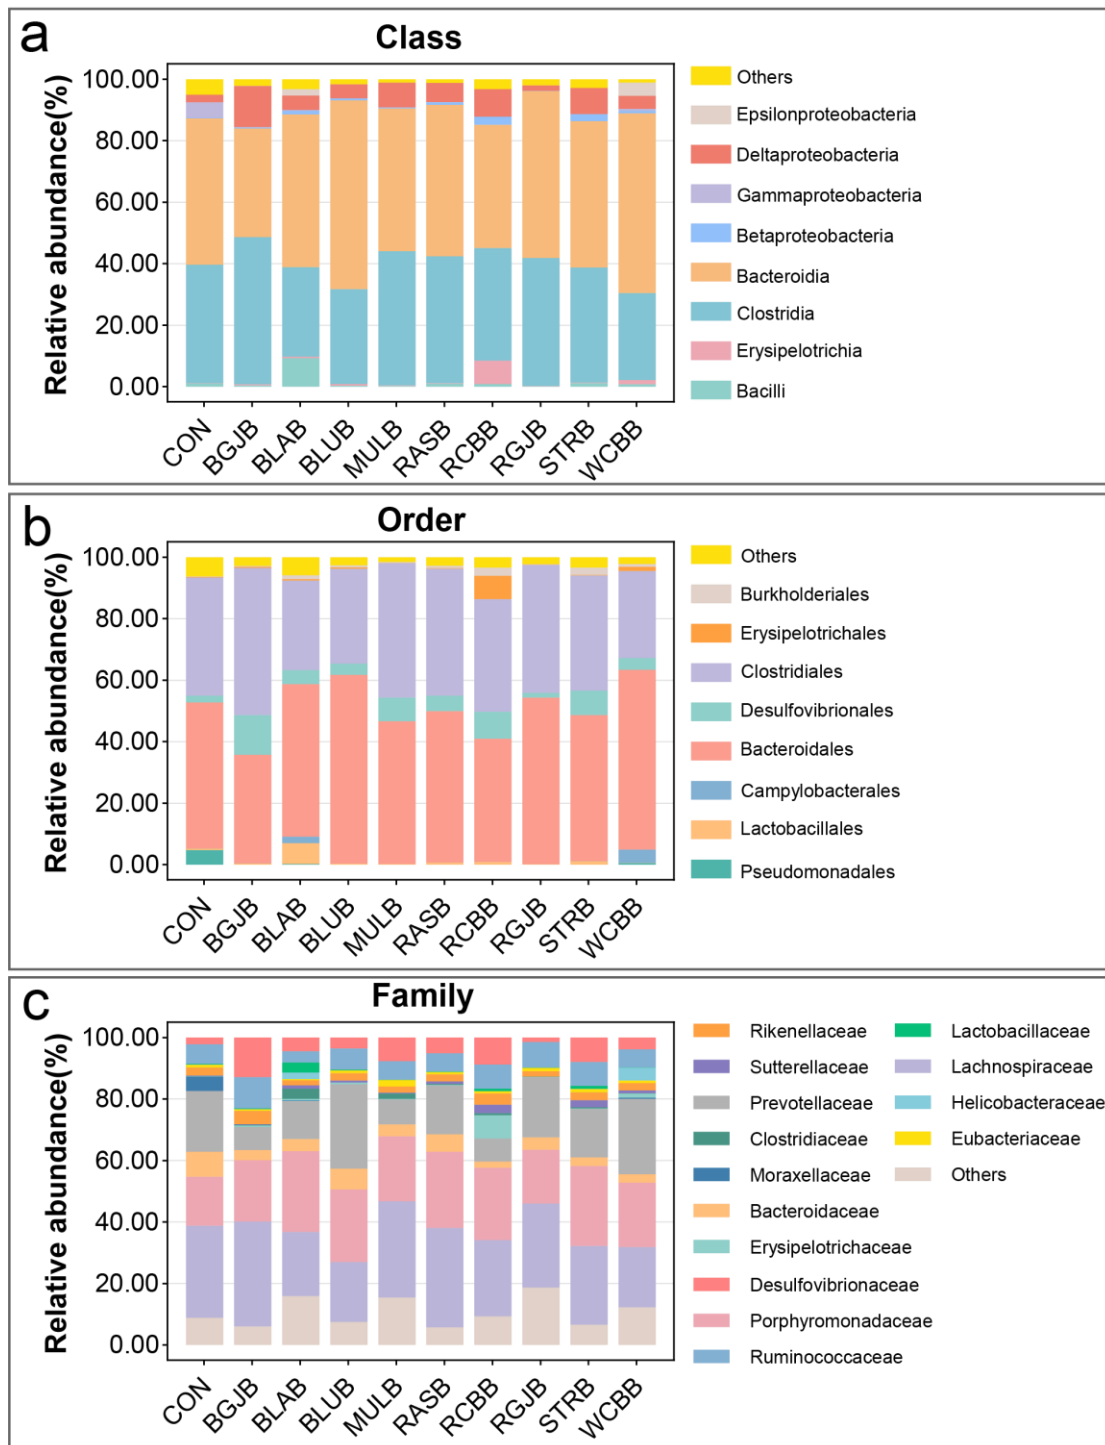

Figure S5. Bacterial taxonomic profiling at the (a) class level, (b) order level and (c) family level of gut bacteria from different mouse groups (n = 7/group).

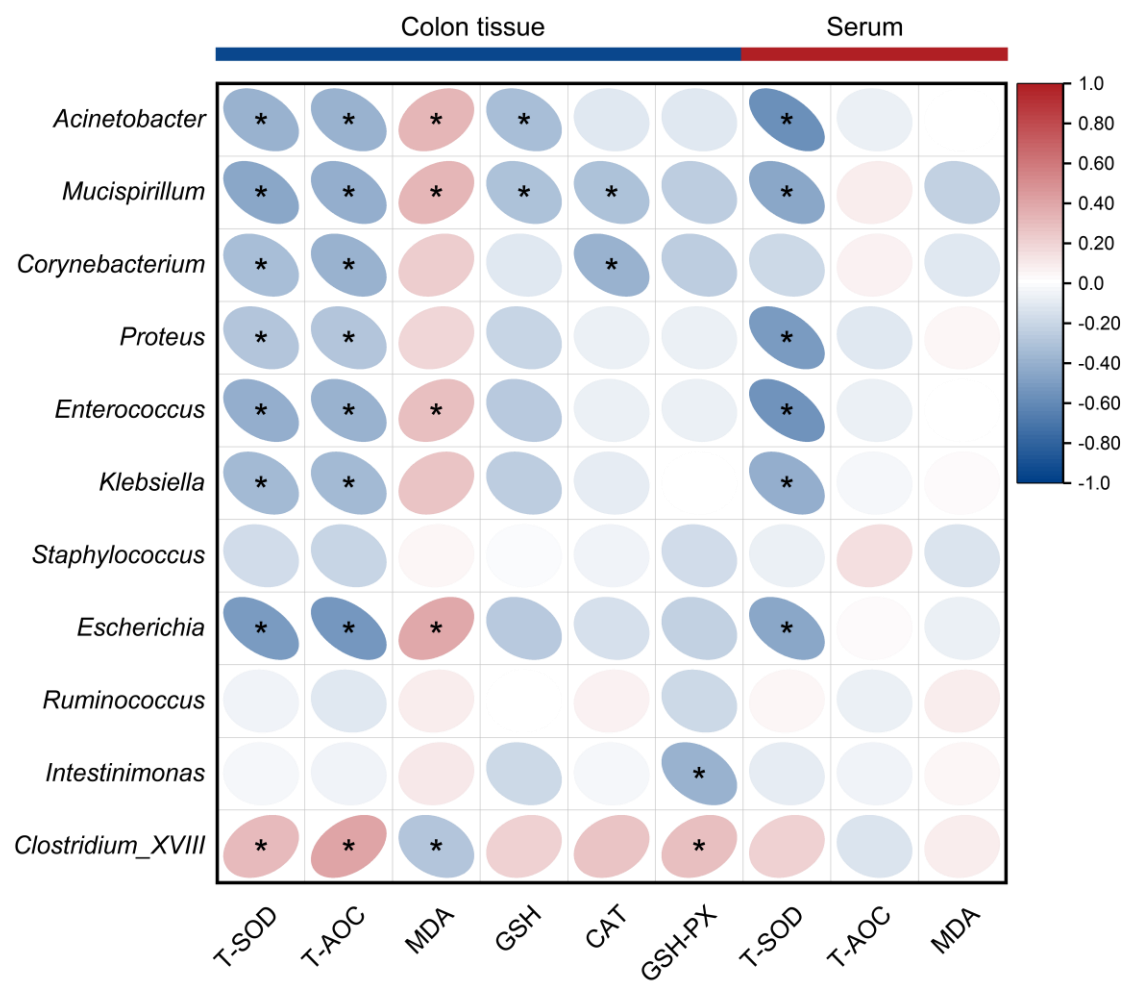

Figure S6: Spearman correlation analysis between gut microbiota and *in vivo* antioxidant indices. The red color denotes a positive correlation, while blue color denotes a negative correlation. The intensity of the color is proportional to the strength of Spearman correlation. \*,  $P < 0.05$ .
